# Supplementary material for: Attitudes of Jordanian Anesthesiologists and Anesthesia Residents towards Artificial Intelligence: A Cross-Sectional Study
Source: MDPI journal article supplement (doi:10.3390/jpm14050447), 2024-04-25
Supplement: s1 [file s1]

**Table S1.** Reliability statistics of the questionnaire's Likert scales.

| Item                                                                                                     | Scale Mean<br>if Item<br>Deleted | Scale Variance<br>if Item Deleted | Corrected<br>Item-Total<br>Correlation | Squared<br>Multiple<br>Correlation | Cronbach's<br>Alpha if Item<br>Deleted |
|----------------------------------------------------------------------------------------------------------|----------------------------------|-----------------------------------|----------------------------------------|------------------------------------|----------------------------------------|
| 1- The role of A.I. in preoperative evaluation (history taking, physical examination, and investigation) | 29.6                             | 104.0                             | 0.797                                  | 0.765                              | 0.936                                  |
| 2- The role of A.I. in preoperative risk stratification                                                  | 29.0                             | 110.1                             | 0.656                                  | 0.535                              | 0.942                                  |
| 3- The role of A.I. in operating room logistics and management                                           | 29.4                             | 107.0                             | 0.754                                  | 0.601                              | 0.938                                  |
| 4- The role of A.I. in management of anesthesia                                                          | 29.6                             | 103.5                             | 0.842                                  | 0.753                              | 0.933                                  |
| 5- The role of A.I. in management of surgeries                                                           | 29.8                             | 106.2                             | 0.760                                  | 0.641                              | 0.937                                  |
| 6- The role of A.I. in events prediction under anesthesia                                                | 29.5                             | 104.4                             | 0.817                                  | 0.724                              | 0.935                                  |
| 7- The role of A.I. in decision making in anesthetic complications and anesthetic crisis                 | 29.7                             | 105.1                             | 0.800                                  | 0.764                              | 0.935                                  |
| 8- The role of A.I. in analysis of anesthetic critical incidents                                         | 29.3                             | 109.3                             | 0.697                                  | 0.632                              | 0.940                                  |
| 9- The role of A.I. in patient centered and equitable pain management                                    | 29.5                             | 106.0                             | 0.821                                  | 0.707                              | 0.935                                  |
| 10- The role of A.I. in postoperative follow-up                                                          | 29.6                             | 107.9                             | 0.701                                  | 0.585                              | 0.940                                  |
